# Supplementary material for: One-step synthesis of red-emitting carbon dots via a solvothermal method and its application in the detection of methylene blue
Source: Royal Society of Chemistry journal article supplement (doi:10.1039/c9ra05570c), 2019-01-01
Supplement: c9ra05570c1.pdf [file c9ra05570c1.pdf]

## Supplementary material

### One-step synthesis of red-emitting carbon dots *via* a solvothermal method and its application in the detection of methylene blue

Dan Zhao, \* Xuemei Liu, Chunjin Wei, Yimo Qu, Xincai Xiao, Han Cheng

School of Pharmaceutical Sciences, South-Central University for Nationalities, Wuhan 430074, P.R. China

Corresponding Author: \* Dr. Dan Zhao, Email: [wqzhdpai@163.com](mailto:wqzhdpai@163.com)

Address: Minzu Avenue#182, School of Pharmaceutical Sciences, South-Central University for Nationalities, Wuhan 430074, P.R. China; Tel:18062084690; Fax:027-67841196

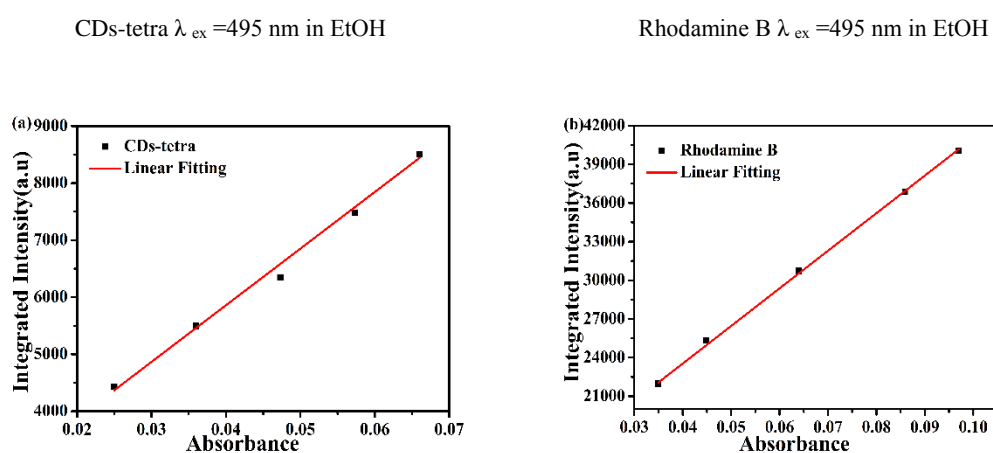

**Fig.S1** Plots of integrated PL intensity of CDs-tetra and rhodamine B (referenced dye) as a function of optical absorbance at 495nm.

**Table S1** Data related to quantum yield calculation

|               | CDs-tetra          |        |        |        |        | Rhodamine B        |        |        |        |        |
|---------------|--------------------|--------|--------|--------|--------|--------------------|--------|--------|--------|--------|
| Abs           | 0.0250             | 0.0360 | 0.0473 | 0.0573 | 0.0660 | 0.0350             | 0.0448 | 0.0640 | 0.0859 | 0.0970 |
| Integrated PL | 4431               | 5495   | 6351   | 7477   | 8501   | 21979              | 25320  | 30728  | 36876  | 40076  |
| Slope         | $9.76 \times 10^4$ |        |        |        |        | $2.88 \times 10^5$ |        |        |        |        |
| QY            | 30.2%              |        |        |        |        | 56%                |        |        |        |        |

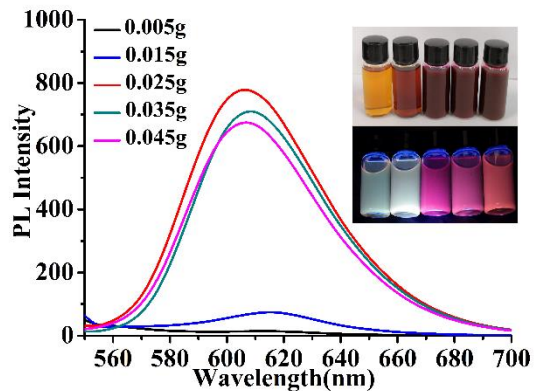

**Fig.S2** Fluorescence spectra of CDs-tetra synthesized from different dosages of raw materials. Insets: photos of CDs solution fluorescent lamp (top) and 365 nm ultraviolet lamp (bottom) synthesized from left to right with 0.005 g, 0.015 g, 0.025 g, 0.035 g and 0.045 g raw materials, respectively.

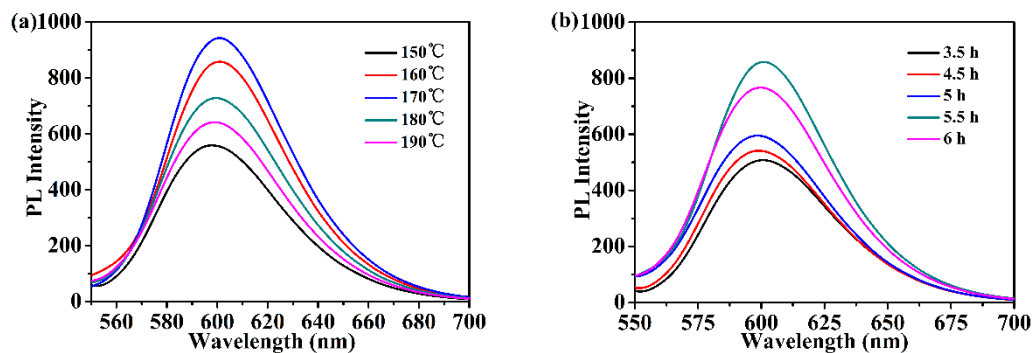

**Fig.S3** (a) Effect of reaction temperature on synthesis of CDs-tetra (b) Effect of reaction time on synthesis of CDs-tetra.

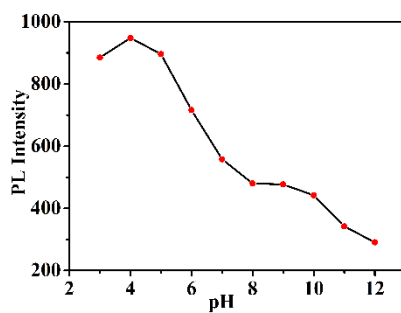

**Fig.S4** PL Intensity at the peak position of CDs-tetra with different pH values.

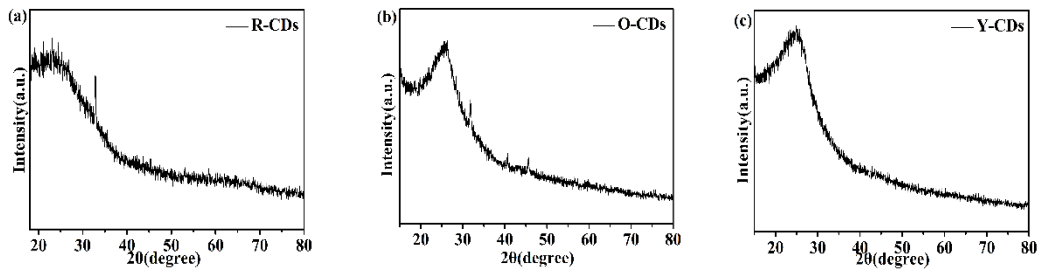

Fig.S5 XRD pattern of the R-CDs(a), O-CDs(b) and Y-CDs(c).

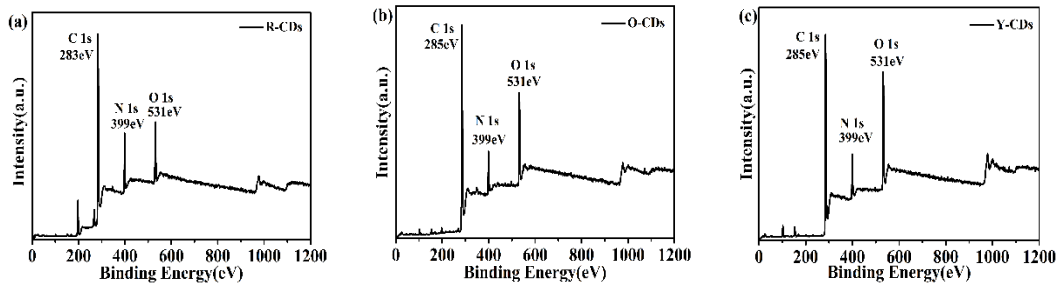

Fig.S6 Full XPS spectra of R-CDs(a), O-CDs(b) and Y-CDs(c).

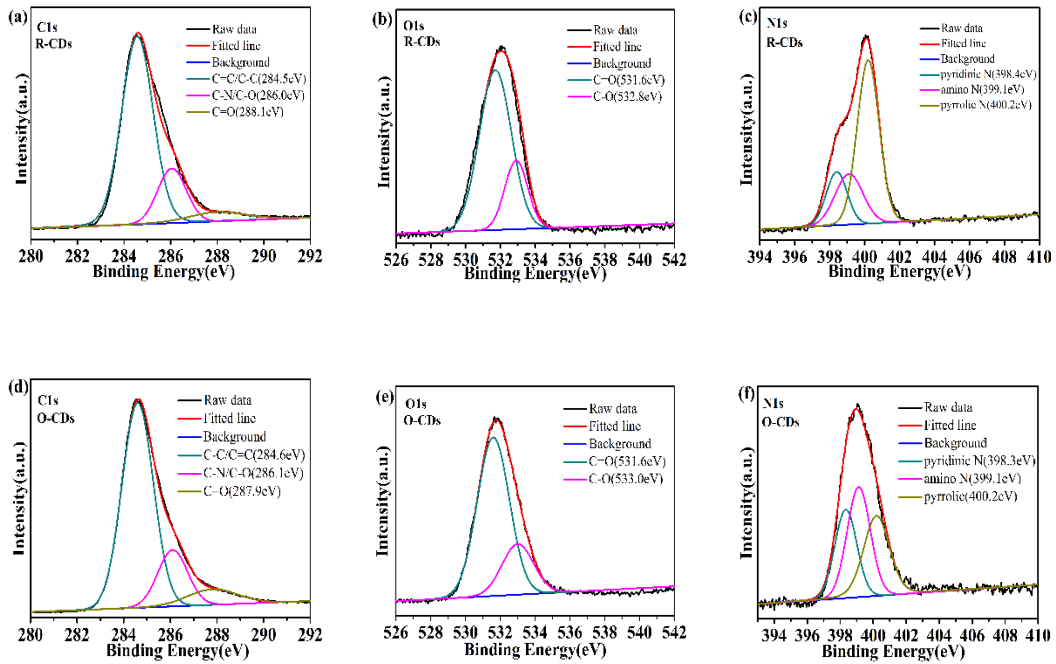

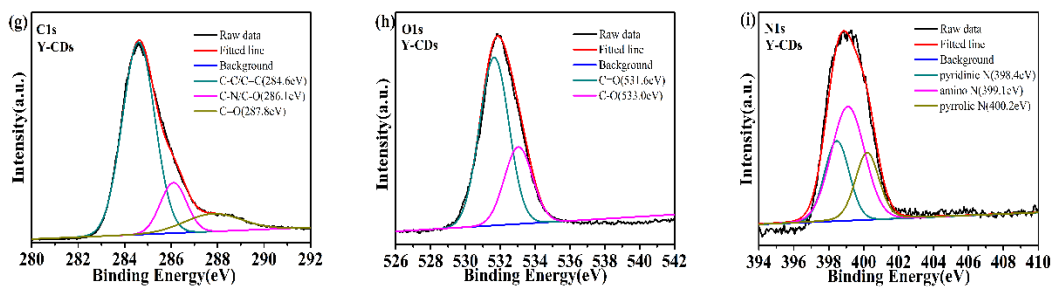

Fig.S7 C 1s, O 1s and N 1s spectra of R-CDs (a, b and c), O-CDs (d, e and f) and Y-CDs (g, h and i).

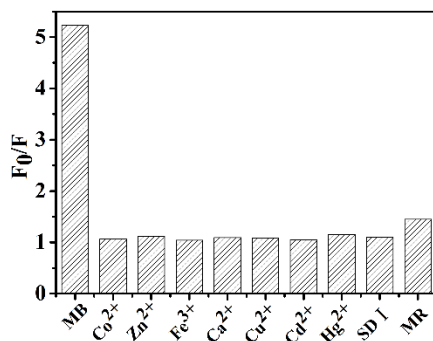

Fig.S8 Sensitivity investigation of the CDs-tetra for MB detection (MB :22.7 $\mu$ M, MR:50 $\mu$ M and other samples concentration:100 $\mu$ M).

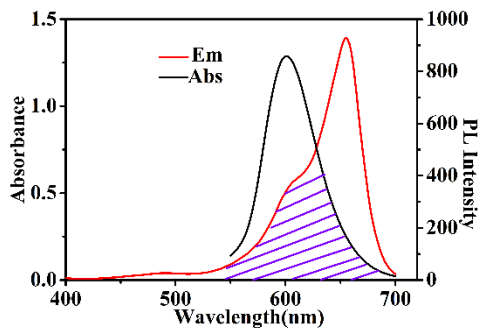

Fig.S9 The overlap between absorption spectrum of MB and the emission spectra of CDs-tetra.
